# Supplementary material for: The Prognostic Value of Preoperative Fibrinogen in Patients with Radical Cholecystectomy
Source: Hindawi journal article supplement (doi:10.1155/2022/5370539), 2022-09-26
Supplement: f1 [file 5370539.f1.docx]

**Supplementary material**


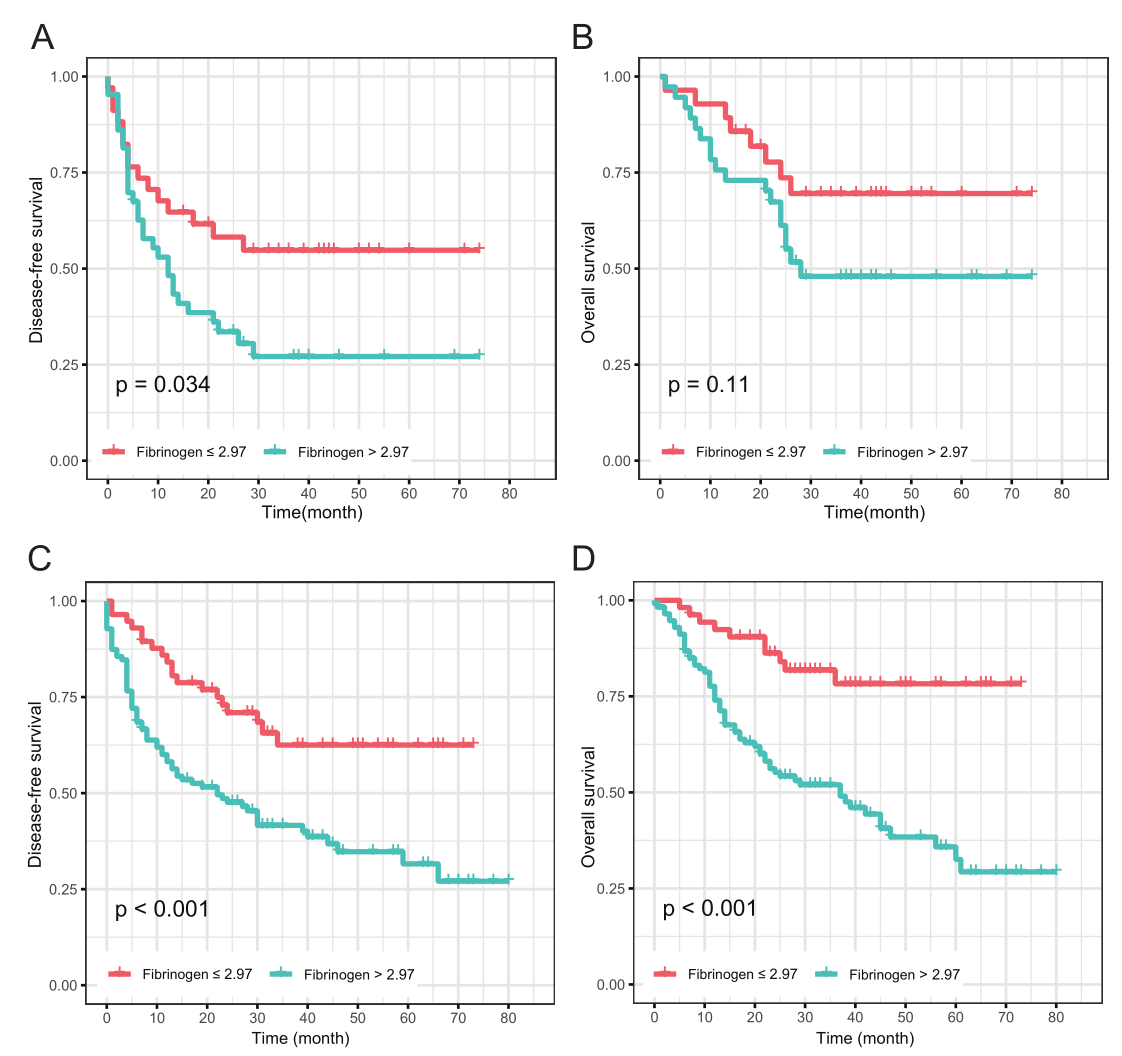


**Figure S1** Kaplan-Meier curve analysis of DFS and OS of GBC patients stratified age and preoperative fibrinogen level. (A) DFS in patients aged≤60. (B) OS in patients aged≤60. (C) DFS in patients aged>60. (D) OS in patients aged>60.


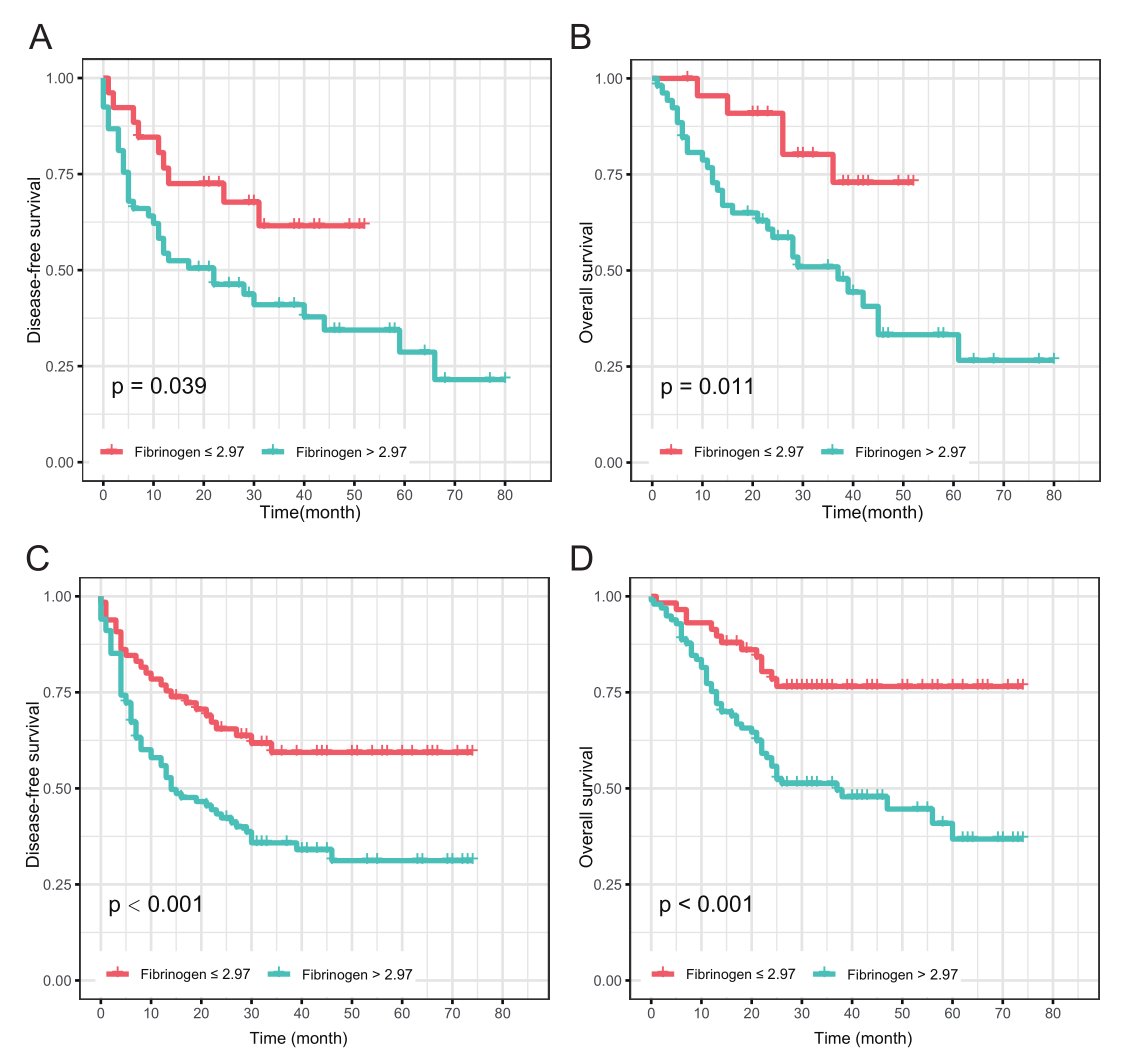


**Figure S2** Kaplan-Meier curve analysis of DFS and OS of GBC patients stratified gender and preoperative fibrinogen level. (A) DFS in male patients. (B) OS in male patients. (C) DFS in female patients. (D) OS in female patients.


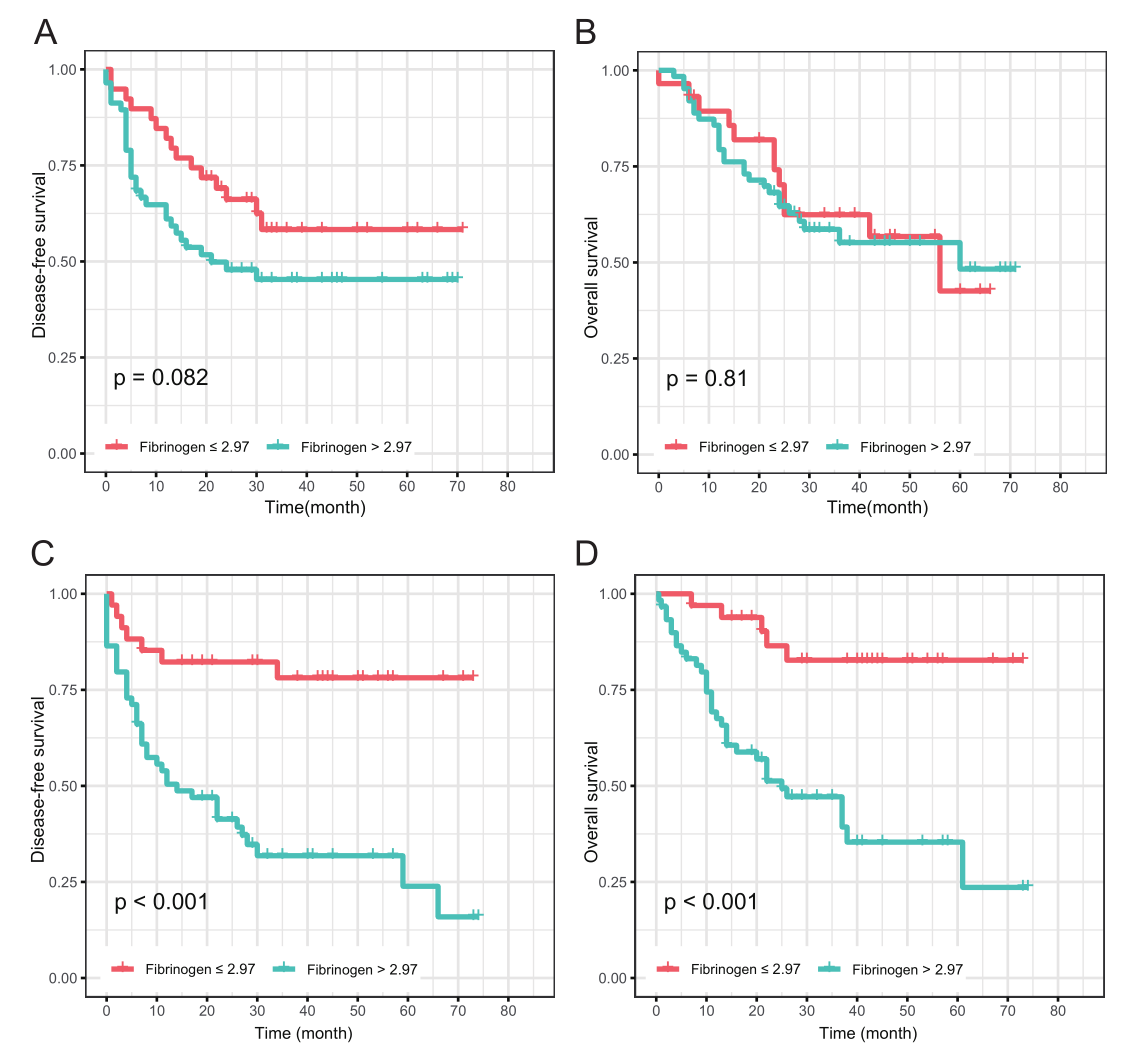


**Figure S3** Kaplan-Meier curve analysis of DFS and OS of GBC patients stratified BMI and preoperative fibrinogen level. (A) DFS in patients with BMI≤22.62. (B) OS in patients with BMI≤22.62. (C) DFS in patients with BMI>22.62. (D) OS in patients with BMI>22.62.
